# Supplementary material
Source: publisher figshare collection journal article supplement (https://karger.figshare.com/articles/dataset/_/6462449)
Supplement: Supplementary file 1 [file 1]

**Supplementary Table 1: Reported cases of pancreatic adenocarcinoma during pregnancy: presentation, diagnosis, and outcome\***

| Source                           | Age (years) | Gestational Age  | Presenting Symptoms                                                                      | Complications/ Metastases                                                              | Diagnosis                                                           | Histologic Diagnosis                                     | Resectable/ Unresectable | Treatments                                                      | Maternal Outcome                                                          | Fetal Outcome                                |
|----------------------------------|-------------|------------------|------------------------------------------------------------------------------------------|----------------------------------------------------------------------------------------|---------------------------------------------------------------------|----------------------------------------------------------|--------------------------|-----------------------------------------------------------------|---------------------------------------------------------------------------|----------------------------------------------|
| <i>Boyle and McLeod 1979[1]</i>  | 37yo G3P3   | 28-32 weeks      | Epigastric pain, vomiting, pancreatitis of pregnancy, postpartum icterus and weight loss | Biliary obstruction, sepsis, metastases to lymph nodes, liver, and spleen              | Postpartum by autopsy                                               | Pancreatic adenocarcinoma                                | Unresectable             | Laparotomy, cholecystectomy, pancreatic pseudocyst drainage     | Maternal demise 13 months after presentation                              | Healthy term infant                          |
| <i>Gamberdella 1984[2]</i>       | 37yo G4P3   | 24 weeks         | Epigastric pain, insomnia, anxiety                                                       | Twin gestation, biliary obstruction                                                    | Antepartum by AUS, ERCP, and exploratory laparotomy                 | Pancreatic adenocarcinoma                                | Unresectable             | Cholecystectomy, C/S at 32 weeks                                | Diffusely metastatic disease with maternal demise 5 months from diagnosis | Healthy 2.1kg and 1.8kg twins                |
| <i>Porcel et al. 1992[3]</i>     | 43yo G1P1   | 28 weeks         | Epigastric pain, vomiting, and back pain                                                 | Pre-eclampsia with HELLP syndrome; postpartum ischemic stroke; metastases to the liver | Postpartum by abdominal ultrasound; CA19-9: 350 U/mL                | Mucinous pancreatic adenocarcinoma                       | Unresectable             | C/S at 30 weeks                                                 | Maternal demise 3 weeks from diagnosis                                    | Alive 1.3kg infant                           |
| <i>Simchuk et al. 1995[4]</i>    | 39yo G2P0   | 16 weeks         | Left upper quadrant pain and anorexia                                                    | Biliary obstruction                                                                    | Antepartum by CT scan with biopsy                                   | Low-grade, well-differentiated pancreatic adenocarcinoma | Unresectable             | Choledochoduodenostomy, C/S at 28 weeks                         | Maternal demise 3 months from diagnosis                                   | Healthy male                                 |
| <i>Blackbourne et al 1997[5]</i> | 32yo        | 14 weeks         | Back pain, vomiting, obstructive jaundice                                                | Biliary obstruction                                                                    | Antepartum by ERCP, confirmed by antepartum laparotomy              | Mucinous pancreatic adenocarcinoma                       | Resectable               | Antepartum pancreaticoduodenectomy                              | Alive and well at 3 months from diagnosis                                 | Fetus developing normally at 3 months postop |
| <i>Gojnic et al. 2005[6]</i>     | 37yo        | Second trimester | Abdominal pain, diarrhea, and constipation                                               |                                                                                        | Antepartum by elevated CA19-9 levels and ultrasound                 | Pancreatic adenocarcinoma                                | Resectable               | Cesarean hysterectomy with pancreatectomy                       | Alive at follow up                                                        | 1.4kg female                                 |
| <i>Marinoni et al. 2006[7]</i>   | 38yo G3P1   | 27 weeks         | Epigastric pain, back pain, obstructive jaundice                                         | Biliary obstruction, severe pre-eclampsia, IUGR, metastases to the liver and lungs     | Antepartum by AUS, ERCP, and MRI; CA19-9: 240U/mL                   | Pancreatic ductal carcinoma                              | Unresectable             | C/S at 30 weeks                                                 | Maternal demise 2.5 months from diagnosis                                 | Healthy 1.1kg female                         |
| <i>Lin Su et al. 2006[8]</i>     | 37yo G4     | 22 weeks         | Epigastric pain                                                                          | Biliary obstruction, Metastases to the liver and placenta                              | Antepartum by AUS and MRCP                                          | Poorly differentiated pancreatic adenocarcinoma          | Unresectable             | Elective termination at 24 weeks; chemotherapy with gemcitabine | Maternal demise 4 weeks after diagnosis                                   | Terminated                                   |
| <i>Al-Adnani et al. 2007[9]</i>  | 27yo G1P0   | 26 weeks         | IUGR; ascites, epigastric mass, and mesenteric lymphadenopathy at C/S                    | IUGR, metastases to the placenta                                                       | Postpartum by intraoperative findings and postpartum CT with biopsy | Poorly differentiated pancreatic adenocarcinoma          | Unresectable             | C/S at 30 weeks for IUGR                                        | Maternal demise 3 months from diagnosis                                   | Healthy 1.1kg female                         |

|                                    |           |          |                                                                                                  |                                                                     |                                                                             |                                                          |              |                                                                                                                |                                                                       |                          |
|------------------------------------|-----------|----------|--------------------------------------------------------------------------------------------------|---------------------------------------------------------------------|-----------------------------------------------------------------------------|----------------------------------------------------------|--------------|----------------------------------------------------------------------------------------------------------------|-----------------------------------------------------------------------|--------------------------|
| <i>Somoye et al. 2008[10]</i>      | 34yo      | 30 weeks | Right upper quadrant pain, vomiting, obstructive jaundice                                        | Biliary obstruction, metastases to the liver                        | Antepartum by MCRP and endoscopic ultrasound                                | Moderately differentiated pancreatic adenocarcinoma      | Unresectable | C/S at 32 weeks, laparotomy with palliative gastric bypass                                                     | Maternal demise 3 months from diagnosis                               | Healthy female           |
| <i>Kazoka et al. 2009[11]</i>      | 40yo G2P1 | 24 weeks | Epigastric pain, vomiting, weight loss, dehydration. Early diagnosis of "gallstone pancreatitis" | Biliary obstruction                                                 | Antepartum by ERCP, MRCP, EUS with biopsy, and CTA<br>CA19-9: 4309U/mL      | Moderately differentiated pancreatic adenocarcinoma      | Resectable   | C/S at 28 weeks, pancreaticoduodenectomy, chemotherapy                                                         | Metastatic liver disease with maternal demise 7 months from diagnosis | Healthy 1.2kg female     |
| <i>Onuma et al. 2010[12]</i>       | 32yo      | 30 weeks | Uterine contractions, right upper quadrant pain, ascites                                         | Preterm labor, acute abdomen, perforated stomach                    | Postpartum by CT and exploratory laparotomy;<br>CA19-9: 4750U/mL            | Intraductal papillary-mucinous pancreatic adenocarcinoma | Resectable   | C/S at 34 weeks, pancreatoduodenectomy                                                                         | Alive and well 26 months after diagnosis                              | Healthy 2.3kg male       |
| <i>Perera et al. 2011[13]</i>      | 25yo G2P1 | 20 weeks | Epigastric pain, vomiting                                                                        | Acute pancreatitis, metastases to the liver                         | Antepartum by MRI and liver biopsy                                          | Pancreatic adenocarcinoma                                | Unresectable | C/S at 30 weeks                                                                                                | Maternal demise 2 weeks from diagnosis                                | Viable                   |
| <i>Marci et al. 2011[14]</i>       | 36yo G7P0 | 35 weeks | Epigastric pain, vomiting, weight loss                                                           | Duodenal obstruction, acute renal failure, metastatic liver disease | Postpartum by abdominal ultrasound and CT                                   | Pancreatic adenocarcinoma                                | Unresectable | C/S at 35 weeks, surgical tx of gastric obstruction, palliative chemotherapy w/ gemcitabine, oxaliplatin       | Alive at 12 months from diagnosis with stable disease                 | Healthy 2.5kg female     |
| <i>Lubner et al. 2011[15]</i>      | 37yo G3P1 | 16 weeks | Vomiting, back pain, + Murphy's sign                                                             | Biliary obstruction                                                 | Antepartum by endoscopic ultrasound with biopsy and MRI;<br>CA19-9: 200U/mL | Poorly differentiated pancreatic adenocarcinoma          | Resectable   | Antepartum pancreatoduodenectomy and cholecystectomy, gemcitabine chemotherapy, induction of labor at 35 weeks | Maternal demise 12 months from diagnosis                              | Healthy 2.1kg male       |
| <i>Boyd et al. 2012 Case 2[16]</i> | 29yo G1P0 | 37 weeks | Epigastric pain and vomiting                                                                     | Metastases to the liver                                             | Postpartum by exploratory laparotomy;<br>CA19-9: 1666959U/mL                | Mucinous pancreatic adenocarcinoma                       | Unresectable | Induction of labor at 37 weeks, palliative left hepatic lobectomy                                              | Maternal demise 3 weeks from diagnosis                                | Healthy infant           |
| <i>Boyd et al. 2012 Case 3[16]</i> | 37yo G3P1 | 17 weeks | Back pain, vomiting                                                                              | Biliary obstruction                                                 | Antepartum by EUS with biopsy                                               | Poorly differentiated pancreatic adenocarcinoma          | Resectable   | Antepartum pancreatoduodenectomy at 19 weeks, gemcitabine chemotherapy, induction of labor at 34 weeks         | Maternal demise 12 months from diagnosis                              | Healthy 2.1kg male       |
| <i>Papoutsis et al. 2012[17]</i>   | 33yo G1P0 | 16 weeks | Weakness, weight loss, anemia                                                                    | Metastases to the liver                                             | Antepartum by EUS with biopsy;<br>CA19-9: 2750U/mL                          | Pancreatic adenocarcinoma                                | Unknown      | Induction of labor for fetal demise                                                                            | Outcome unknown                                                       | Fetal demise at 19 weeks |
| <i>Lui et al. 2015[18]</i>         | 35yo G3P1 | 22 weeks | Back pain and weight loss                                                                        | Metastases to the liver                                             | Antepartum by MRI; CA19-9: 40U/mL                                           | Pancreatic ductal adenocarcinoma                         | Unresectable | Induction of labor at 30 weeks; palliative chemotherapy                                                        | Maternal demise 6 months from diagnosis                               | Healthy 1.2kg female     |

[illegible]

## TABLE REFERENCES

- 1 Boyle JM, McLeod ME: Pancreatic cancer presenting as pancreatitis of pregnancy. Case report. *Am J Gastroenterol* 1978;70:371-373.
- 2 Gamberdella FR: Pancreatic carcinoma in pregnancy: a case report. *Am J Obstet Gynecol* 1984;149:15-17.
- 3 Porcel JM, Ordi J, Castells L, Farran I: Probable pancreatic cancer in a pre-eclamptic patient. *Eur J Obstet Gynecol Reprod Biol* 1992;44:80-82.
- 4 Simchuk EJ, 3rd, Welch JP, Orlando R, 3rd: Antepartum diagnosis of pancreatic carcinoma: a case report. *Conn Med* 1995;59:259-262.
- 5 Blackbourne LH, Jones RS, Catalano CJ, Iezzoni JC, Bourgeois FJ: Pancreatic adenocarcinoma in the pregnant patient: case report and review of the literature. *Cancer* 1997;79:1776-1779.
- 6 Gojnic M, Boskovic V, Fazlagic A, Mostic T, Vidakovic S, Stefanovic A, Pervulov M, Petkovic S: Pancreatic tumor in a pregnant woman: a rare case report. *Eur J Gynaecol Oncol* 2005;26:221-224.
- 7 Marinoni E, Di Netta T, Caramanico L, Tomei B, Moscarini M, Di Iorio R: Metastatic pancreatic cancer in late pregnancy: a case report and review of the literature. *J Matern Fetal Neonatal Med* 2006;19:247-249.
- 8 Su LL, Biswas A, Wee A, Sufyan W: Placental metastases from pancreatic adenocarcinoma in pregnancy. *Acta Obstet Gynecol Scand* 2006;85:626-627.
- 9 Al-Adnani M, Kiho L, Scheimberg I: Maternal pancreatic carcinoma metastatic to the placenta: a case report and literature review. *Pediatr Dev Pathol* 2007;10:61-65.
- 10 Somoye G, Praseedom RK, Hoveyda F: Adenocarcinoma of the pancreas complicated by obstructive jaundice in pregnancy. *J Obstet Gynaecol* 2008;28:536-537.
- 11 Kakoza RM, Vollmer CM, Jr., Stuart KE, Takoudes T, Hanto DW: Pancreatic adenocarcinoma in the pregnant patient: a case report and literature review. *J Gastrointest Surg* 2009;13:535-541.
- 12 Onuma T, Yoshida Y, Yamamoto T, Kotsuji F: Diagnosis and management of pancreatic carcinoma during pregnancy. *Obstet Gynecol* 2010;116 Suppl 2:518-520.
- 13 Perera D, Kandavar R, Palacios E: Pancreatic adenocarcinoma presenting as acute pancreatitis during pregnancy: clinical and radiologic manifestations. *J La State Med Soc* 2011;163:114-117.
- 14 Marci R, Pansini G, Zavatta C, Mossuto E, Giugliano E, Marzola M, Patella A: Pancreatic cancer with liver metastases in a pregnant patient: case report and review of the literature. *Clin Exp Obstet Gynecol* 2012;39:127-130.
- 15 Lubner S, Hall B, Gopal D, Soni A, Hegeman R, Winterle N, Loeffler A, Weber S, Reeder S, Loconte N: A 37 year-old pregnant woman with pancreatic adeno-carcinoma treated with surgery and adjuvant chemotherapy: A case report and literature review. *J Gastrointest Oncol* 2011;2:258-261.
- 16 Boyd CA, Benarroch-Gampel J, Kilic G, Kruse EJ, Weber SM, Riall TS: Pancreatic neoplasms in pregnancy: diagnosis, complications, and management. *J Gastrointest Surg* 2012;16:1064-1071.
- 17 Papoutsis D, Sindos M, Papantoniou N, Antsaklis A: Management options and prognosis of pancreatic adenocarcinoma at 16 weeks' gestation: a case report. *J Reprod Med* 2012;57:167-170.
- 18 Lui M-W, Lai CWS, Ong CY-T: Metastatic pancreatic adenocarcinoma presented as back pain in pregnancy: case report and review of literature. *The Journal of Maternal-Fetal & Neonatal Medicine* 2015;29:1421-1424.
- 19 Davis J, Bashir S, Wubneh H, Borum ML: Metastatic Pancreatic Adenocarcinoma During Pregnancy. *ACG Case Rep J* 2016;3:e190.
- 20 Sahin Aker S, Katlan DC, Yuce T, Soylemez F: Placental, hepatic, and supraclavicular lymph node metastasis in pancreatic adenocarcinoma during pregnancy: A case report. *Turk J Obstet Gynecol* 2016;13:161-163.
